# Supplementary material
Source: PubMed Central journal article supplement (PMC7609022)

## Supplementary Figure - Uncropped scans with size marker indications

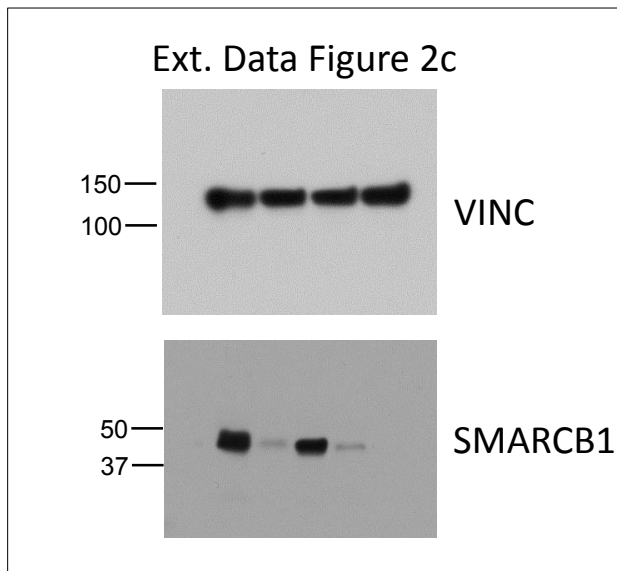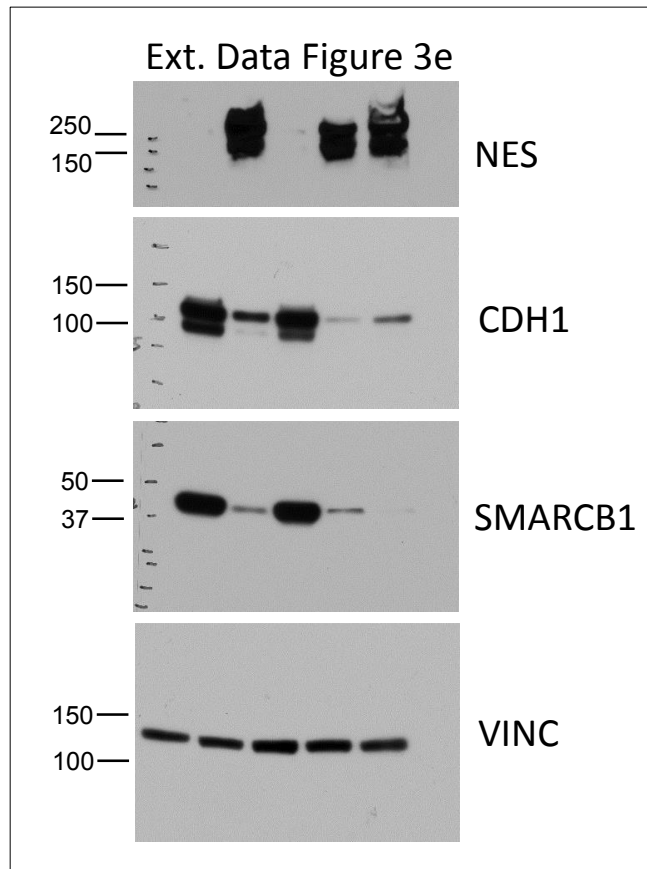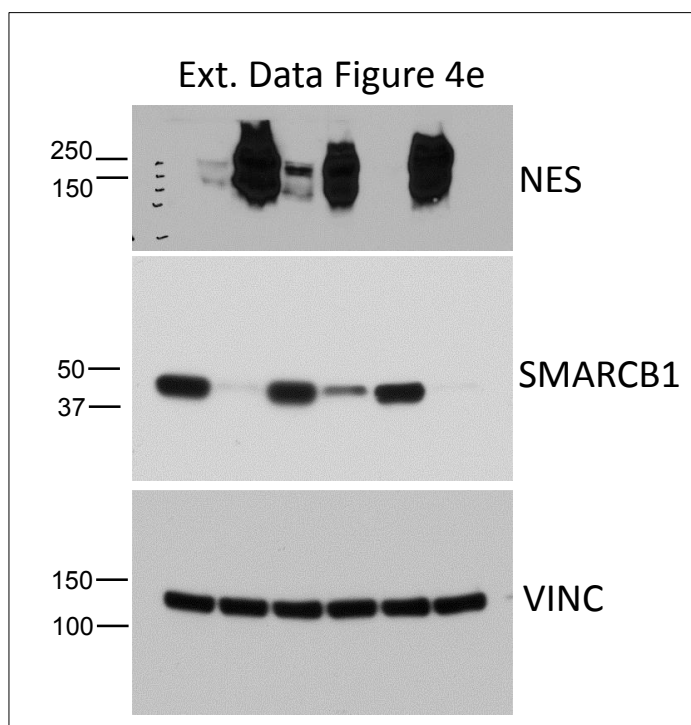

Supplementary Figure - Uncropped scans with size marker indications

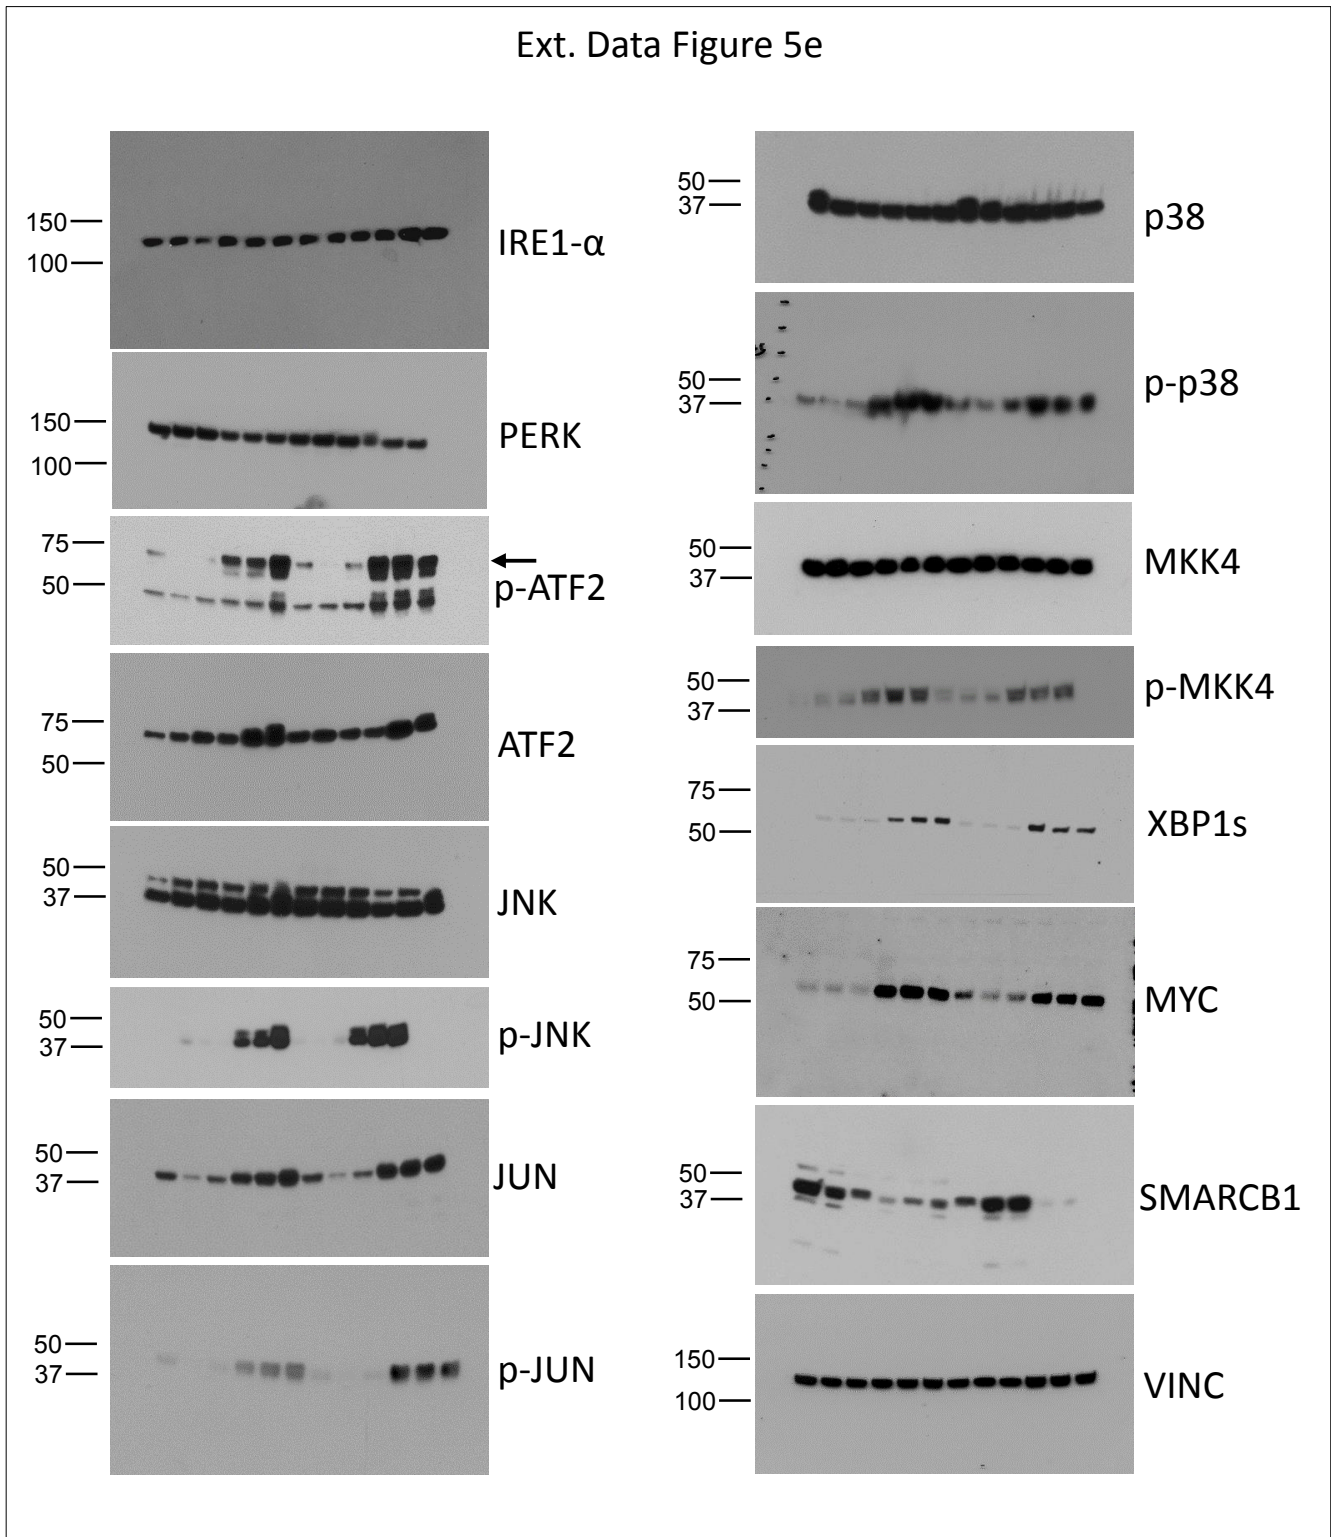

Supplementary Figure - Uncropped scans with size marker indications

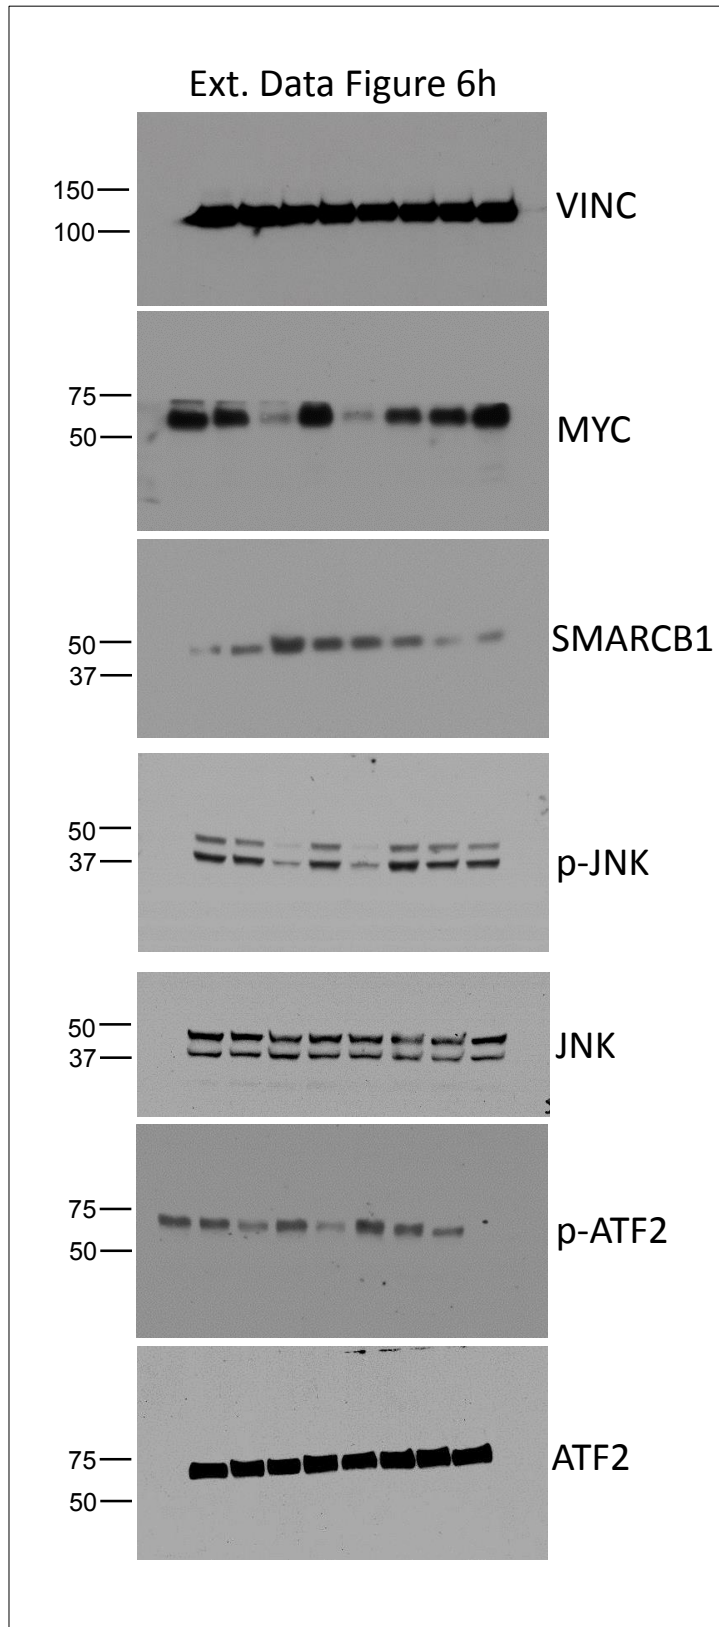

## Supplementary Figure - Uncropped scans with size marker indications

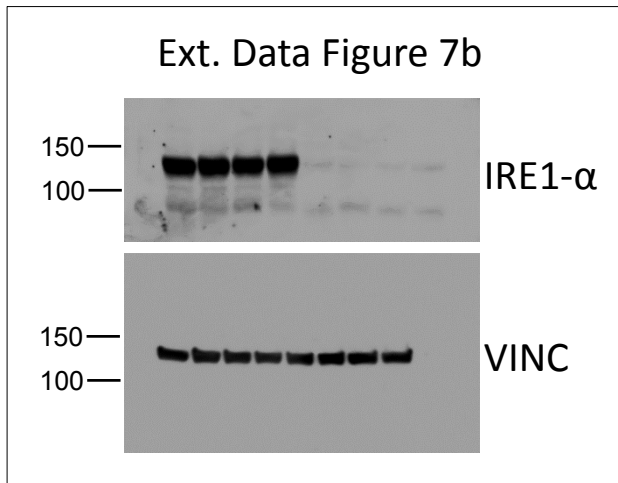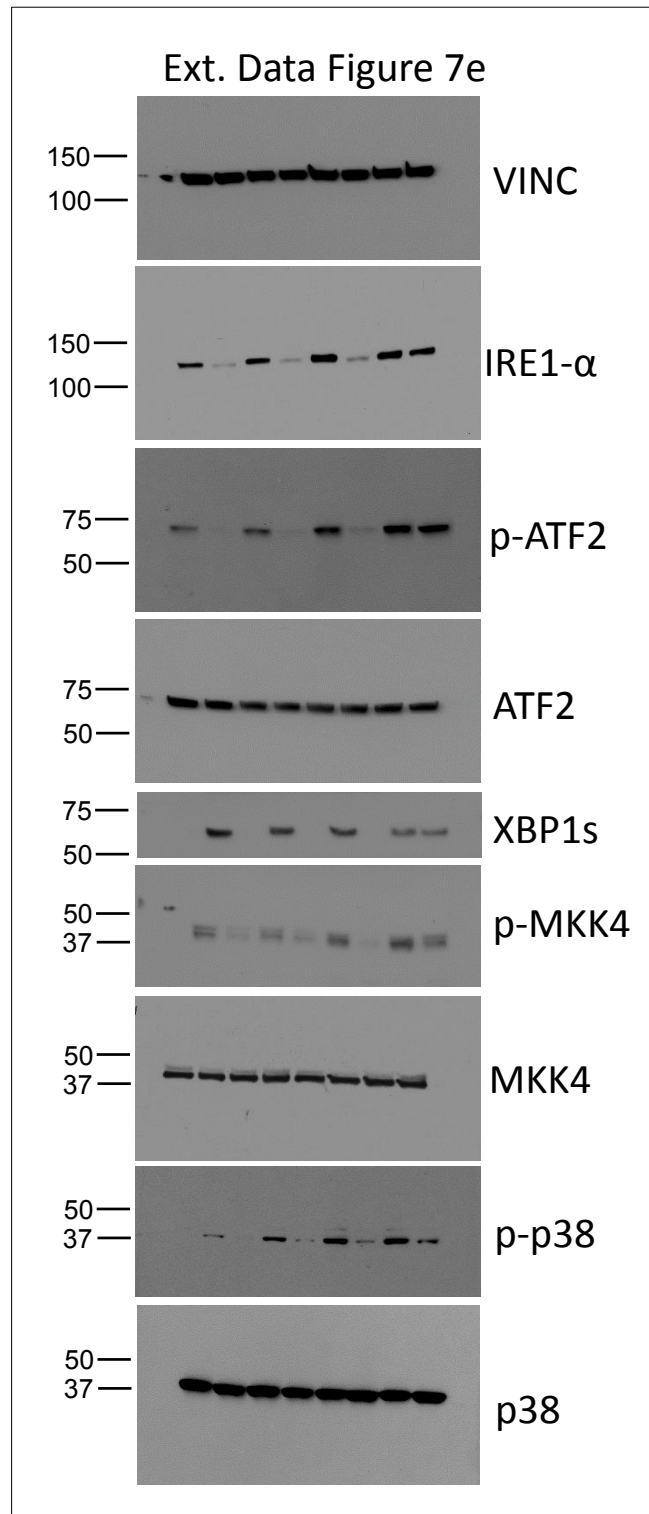

Supplementary Figure - Uncropped scans with size marker indications

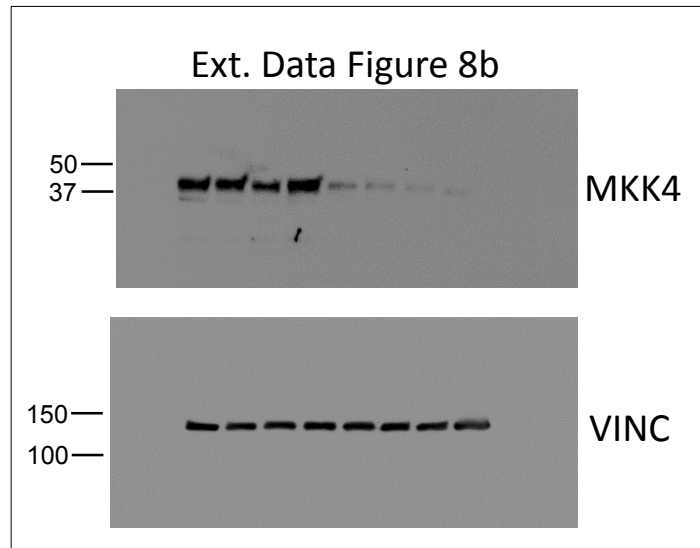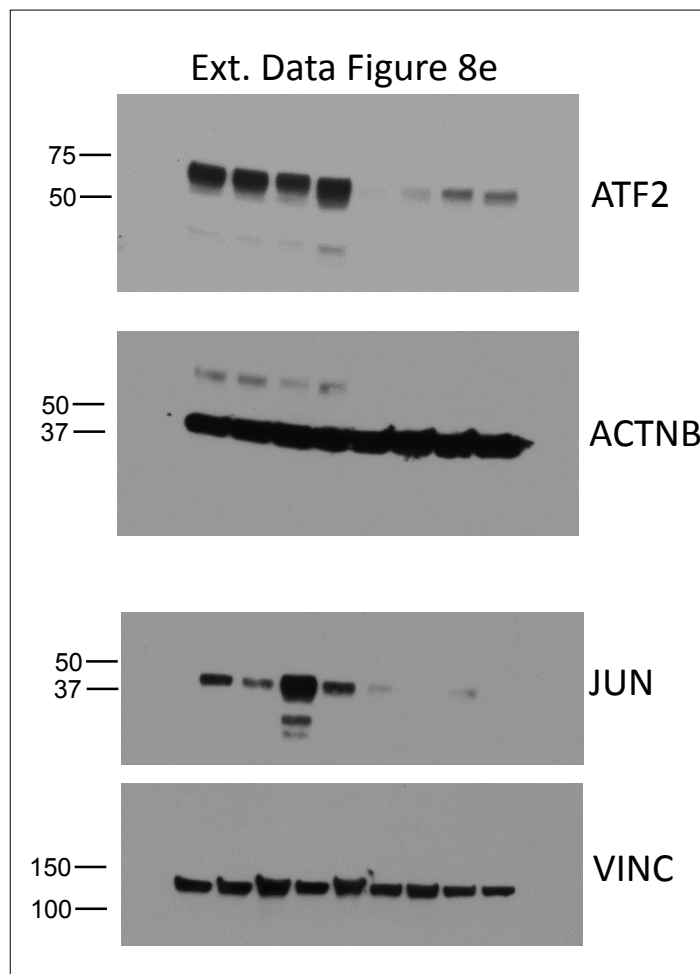

Supplement: NIHMS958675-supplement-2.pdf [file NIHMS958675-supplement-2.pdf]
